# Supplementary material for: Nitrogen-Doped Hierarchical Porous Carbon Derived from Coal for High-Performance Supercapacitor
Source: MDPI journal article supplement (doi:10.3390/molecules28093660), 2023-04-23
Supplement: s1 [file s1]

# Supplementary Materials

## Nitrogen-Doped Hierarchical Porous Carbon Derived from Coal for High-Performance Supercapacitor

Leiming Cai, Yanzhe Zhang, Rui Ma, Xia Feng, Lihua Yan, Diansheng Jia,  
Mengjiao Xu, Lili Ai, Nannan Guo \* and Luxiang Wang \*

State Key Laboratory of Chemistry and Utilization of Carbon Based Energy Resources, College of Chemistry, Xinjiang University, Urumqi 830017, China

\* Correspondence: guonan067@xju.edu.cn (N.G.); wangluxiang@xju.edu.cn (L.W.)

**Table S1.** Pore structures of all samples.

| Sample | BET<br>SSA<br>(m <sup>2</sup> g <sup>-1</sup> ) | Pore<br>Volume<br>(cm <sup>3</sup> g <sup>-1</sup> ) | Mesopore<br>Volume<br>(cm <sup>3</sup> g <sup>-1</sup> ) | Micropore<br>Volume<br>(cm <sup>3</sup> g <sup>-1</sup> ) | V <sub>micro</sub> /<br>(V <sub>micro</sub> + V <sub>meso</sub> ) |
|--------|-------------------------------------------------|------------------------------------------------------|----------------------------------------------------------|-----------------------------------------------------------|-------------------------------------------------------------------|
| Mi-CPC | 1268                                            | 0.56                                                 | 0.12                                                     | 0.44                                                      | 78.6%                                                             |
| h-CPC  | 1735                                            | 1.27                                                 | 0.76                                                     | 0.51                                                      | 40%                                                               |
| Me-CPC | 320                                             | 0.17                                                 | 0.07                                                     | 0.10                                                      | 59%                                                               |

Notes: The pore size distribution is calculated from the corresponding adsorption branch of N<sub>2</sub> isotherm by the nonlocal density functional theory (NLDFT) method for micropores and Barrett-Joyner-Halenda method for mesopores. The total pore volume here is equal to the sum of mesopore volume and micropore volume.

**Table S2.** elemental analysis of the raw coal, OC and prepared samples.

| Sample | C (wt.%) | H (wt.%) | N (wt.%) | O (wt.%) |
|--------|----------|----------|----------|----------|
| Coal   | 77.29    | 4.13     | 0.93     | 17.65    |
| OC     | 48.11    | 1.83     | 4.2      | 45.86    |
| Mi-CPC | 70.4     | 0.55     | 1.71     | 28.34    |
| h-CPC  | 75.98    | 0.55     | 2.87     | 20.6     |
| Me-CPC | 65.99    | 0.3      | 10.93    | 22.78    |

**Table S3.** Elements content obtained from the XPS data of all samples.

| Samples | C (at. %) | N (at. %) | O (at. %) |
|---------|-----------|-----------|-----------|
| Mi-CPC  | 90.91     | 1.40      | 7.69      |
| h-CPC   | 85.03     | 5.34      | 9.63      |
| Me-CPC  | 74.76     | 18.31     | 6.93      |

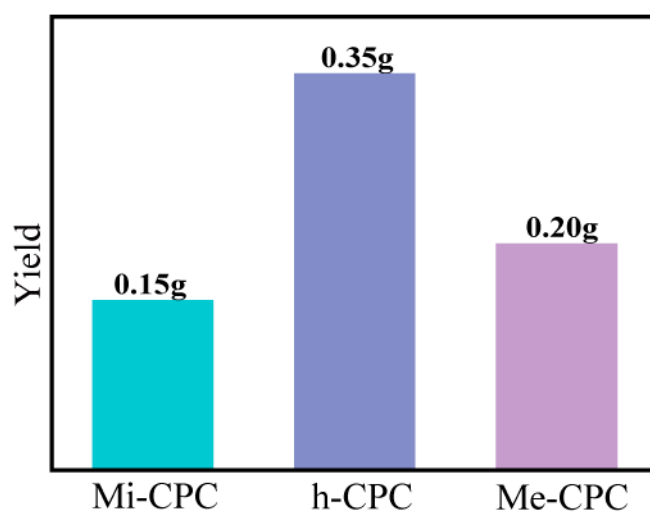

**Figure S1.** The yield data of all samples.

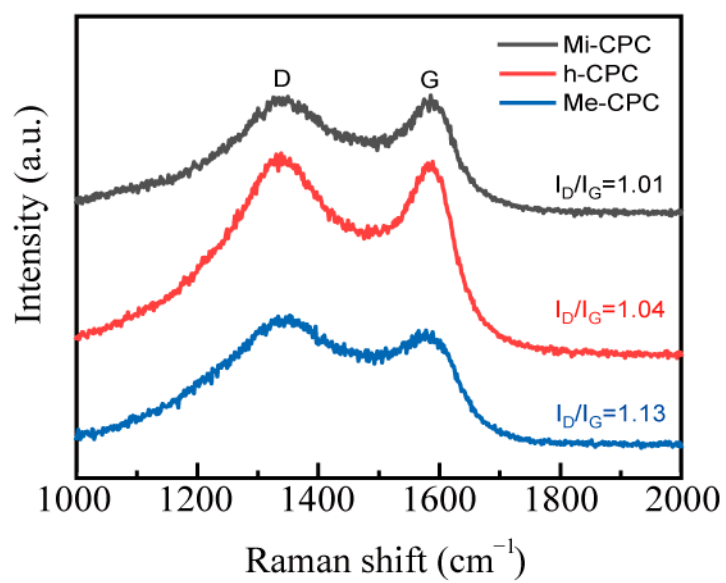

**Figure S2.** The Raman spectra of all samples.

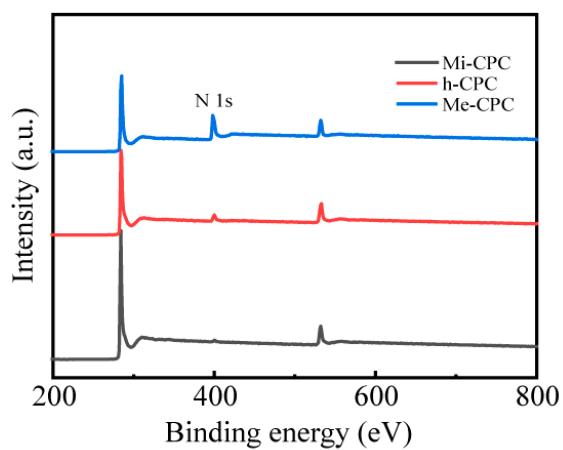

**Figure S3.** XPS survey spectra of Mi-CPC, h-CPC and Me-CPC.

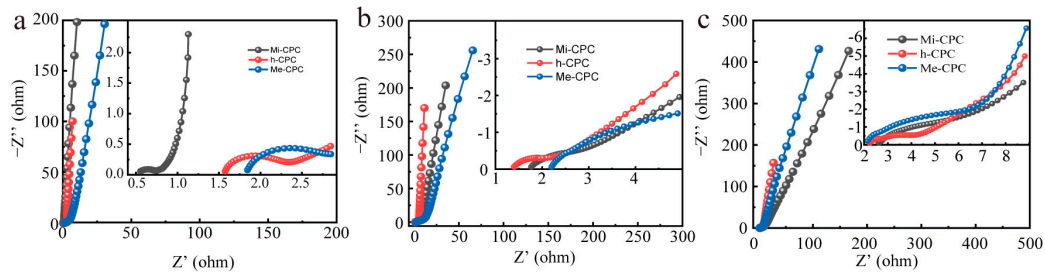

**Figure S4.** Nyquist plots of all resultant samples electrodes: (a) in two-electrode system with 6 M KOH electrolyte, (b) in two-electrode system with 1 M Na<sub>2</sub>SO<sub>4</sub> electrolyte, (c) in two-electrode system with EMIM BF<sub>4</sub> electrolyte.

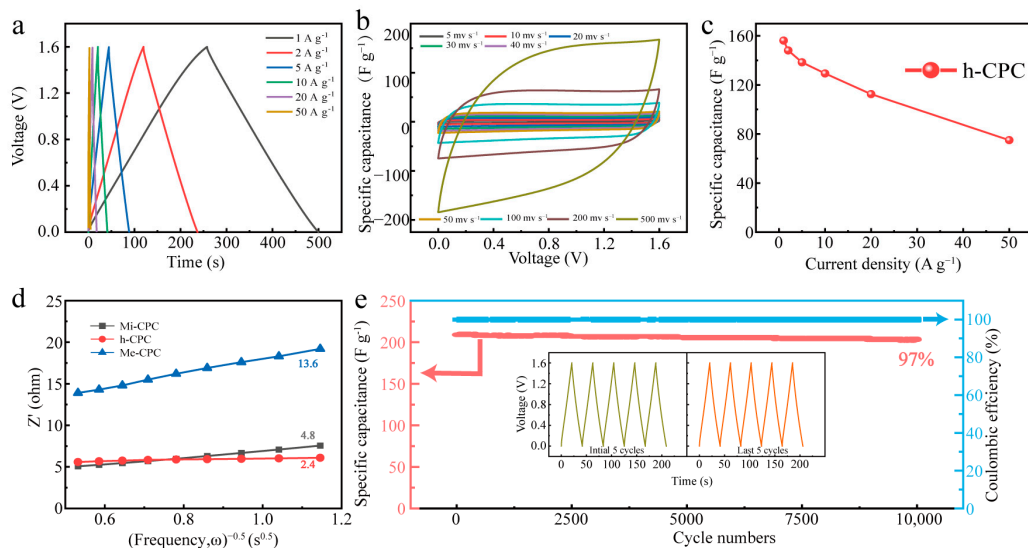

**Figure S5.** Electrochemical performance of h-CPC in a 1 M Na<sub>2</sub>SO<sub>4</sub> electrolyte for a two-electrode system: (a) GCD curves, (b) CV curves, (c) specific capacitance at different current densities. (d)  $Z'$  versus  $\omega^{-1/2}$  plots for Mi-CPC, h-CPC and Me-CPC. and (e) cycling performance of h-CPC.

**Table S4.** Comparisons of the capacitive performances for the h-CPC electrode in this work and reported carbon materials from literatures.

| Sample                                          | Energy Density/<br>Power Density<br>(Wh kg <sup>-1</sup> /W kg <sup>-1</sup> ) | Electrolyte                     | Ref.      |
|-------------------------------------------------|--------------------------------------------------------------------------------|---------------------------------|-----------|
| N, S self-doped porous carbon nanosheets        | 7.4/486.7                                                                      | 6M KOH                          | 1         |
| Porous carbon nanospheres                       | 6.5/80<br>3.7/4000                                                             | 6M KOH                          | 2         |
| N,O-codoped egg-box-like carbons                | 8.09/257                                                                       | 6M KOH                          | 3         |
| Rice husk-based hierarchical porous carbon      | 7.7/241                                                                        | 6M KOH                          | 4         |
| Hollow N-doped carbon frameworks                | 4.36/249                                                                       | 6M KOH                          | 5         |
| N-doped porous carbon nanosheets                | 7.15/50.4                                                                      | 6M KOH                          | 6         |
| Hierarchical porous carbon spheres              | 7.8/31.2<br>5.1/6200                                                           | 6M KOH                          | 7         |
| Heteroatom incorporated porous carbon           | 9/227                                                                          | 6M KOH                          | 8         |
| Hierarchical porous carbon nanorods             | 6.77/100<br>3.6/10000                                                          | 6M KOH                          | 9         |
| Hierarchical coal-based porous carbon materials | 8.3/250                                                                        | 6M KOH                          | This work |
| Honeycomblike mesoporous carbons                | 31.7/620<br>18/10600                                                           | 1 M<br>TEABF <sub>4</sub> /AN   | 10        |
| N-doped graphene                                | 34.5/679.4<br>12.8/251400                                                      | BMIMBF <sub>4</sub>             | 11        |
| Natural shiitake mushroom                       | 41/875<br>31/6750                                                              | 1 M<br>(TEABF <sub>4</sub> /AN) | 12        |
| Hair derived micro/mesoporous carbon            | 45.33/75<br>29/2243                                                            | 1 M LiPF <sub>6</sub><br>EC/DEC | 13        |
| Graphitic carbon nanosheets                     | 40/750<br>19/20000                                                             | BMPY TFSI                       | 14        |
| Hierarchical coal-based porous carbon materials | 48.3/759                                                                       | BMIMBF <sub>4</sub>             | This work |

## References

- [1] Miao, L.; Zhu, D.; Liu, M.; Duan, H.; Wang, Z.; Lv, Y.; Xiong, W.; Zhu, Q.; Li, L.; Chai, X.; et al. Cooking carbon with protic salt: Nitrogen and sulfur self-doped porous carbon nanosheets for supercapacitors. *Chem. Eng. J.* **2018**, *347*, 233–242.
- [2] Song, Z.; Zhu, D.; Li, L.; Chen, T.; Duan, H.; Wang, Z.; Lv, Y.; Xiong, W.; Liu, M.; Gan, L. Ultrahigh energy density of a N, O codoped carbon nanosphere based all-solid-state symmetric supercapacitor. *J. Mater. Chem. A* **2019**, *7*, 1177–1186.
- [3] Wei, F.; He, X.; Ma, L.; Zhang, H.; Xiao, N.; Qiu, J. 3D N, O-Codoped Egg-Box-Like Carbons with Tuned Channels for High Areal Capacitance Supercapacitors. *Nano-Micro Lett.* **2020**, *12*, 82.
- [4] Chen, Z.; Wang, X.; Xue, B.; Li, W.; Ding, Z.; Yang, X.; Qiu, J.; Wang, Z. Rice husk-based hierarchical porous carbon for high performance supercapacitors: The structure-performance relationship. *Carbon* **2020**, *161*, 432–444.
- [5] Wang, M.; Yang, J.; Jia, K.; Liu, S.; Hu, C.; Qiu, J. Boosting Supercapacitor Performance of Graphene by Coupling with Nitro-gen-Doped Hollow Carbon Frameworks. *Chem. Eur. J.* **2020**, *26*, 2897–2903.
- [6] Wang, D.; Wang, Y.; Chen, Y.; Liu, W.; Wang, H.; Zhao, P.; Li, Y.; Zhang, J.; Dong, Y.; Hu, S.; et al. Coal tar pitch derived N-doped porous carbon nanosheets by the in-situ formed g-C<sub>3</sub>N<sub>4</sub> as a template for supercapacitor electrodes. *Electrochim. Acta* **2018**, *283*, 132–140.
- [7] Pang, J.; Zhang, W.; Zhang, H.; Zhang, J.; Zhang, H.; Cao, G.; Han, M.; Yang, Y. Sustainable nitrogen-containing hierarchical porous carbon spheres derived

- from sodium lignosulfonate for high-performance supercapacitors. *Carbon* **2018**, *132*, 280–293.
- [8] Jia, H.; Sun, J.; Xie, X.; Yin, K.; Sun, L. Cicada slough-derived heteroatom incorporated porous carbon for supercapacitor: Ultra-high gravimetric capacitance. *Carbon* **2019**, *143*, 309–317.
- [9] Fang, L.; Xie, Y.; Wang, Y.; Zhang, Z.; Liu, P.; Cheng, N.; Liu, J.; Tu, Y.; Zhao, H.; Zhang, J. Facile synthesis of hierarchical porous carbon nanorods for supercapacitors application. *Appl. Surf. Sci.* **2019**, *464*, 479–487.
- [10] Guan, T.; Zhao, J.; Zhang, G.; Wang, J.; Zhang, D.; Li, K. Template-Free Synthesis of Honeycombl like Porous Carbon Rich in Specific 2–5 nm Mesopores from a Pitch-Based Polymer for a High-Performance Supercapacitor. *ACS Sustain. Chem. Eng.* **2019**, *7*, 2116–2126.
- [11] Dai, S.; Liu, Z.; Zhao, B.; Zeng, J.; Hu, H.; Zhang, Q.; Chen, D.; Qu, C.; Dang, D.; Liu, M. A high-performance supercapacitor electrode based on N-doped porous graphene. *J. Power Sources* **2018**, *387*, 43–48.
- [12] Cheng, P.; Gao, S.; Zang, P.; Yang, X.; Bai, Y.; Xu, H.; Liu, Z.; Lei, Z. Hierarchically porous carbon by activation of shiitake mushroom for capacitive energy storage. *Carbon* **2015**, *93*, 315–324.
- [13] Qian, W.; Sun, F.; Xu, Y.; Qiu, L.; Liu, C.; Wang, S.; Yan, F. Human hair-derived carbon flakes for electrochemical supercapacitors. *Energy Environ. Sci.* **2014**, *7*, 379–386.
- [14] Wang, H.; Xu, Z.; Kohandehghan, A.; Li, Z.; Cui, K.; Tan, X.; Stephenson, T.J.; King'ondeu, C.K.; Holt, C.M.B.; Olsen, B.C.; et al. Interconnected Carbon Nanosheets Derived from Hemp for Ultrafast Supercapacitors with High Energy. *ACS Nano* **2013**, *7*, 5131–5141.
